# Supplementary material
Source: Research Square preprint supplement (doi:10.21203/rs.3.rs-8778324/v1)
Supplement: Supplementary file 1 [file f7cb95fa119a452a7af20b40.docx]

### **Policy Summary Box**

1. **India’s current malaria investment is insufficient.**
   Public spending on malaria averages **INR 4,451 million (≈ US$52 million; INR 6 per capita), which is** among the lowest globally. At current funding levels, India will not meet its malaria elimination target by 2030.
2. **A fourfold increase in funding is economically justified.**
   An optimal annual investment of **INR 16,414 million (≈ US$193 million)** would reduce malaria cases and deaths by more than **99%** and yield returns of up to **3.18 times** the initial investment through productivity gains and reduced treatment costs.
3. **Malaria elimination is a macroeconomic development priority, not just a health expenditure.**
   Elimination would avert tens of thousands of deaths, reduce households' out-of-pocket expenditures, improve workforce productivity, and contribute to GDP growth - thereby directly supporting the Sustainable Development Goals.
4. **Domestic financing and sustained political commitment are essential.**
   Dependence on external assistance should transition to **ring-fenced national and state budgets**, performance-linked financing, and strategic private-sector engagement to ensure program continuity and prevent resurgence.
5. **District-focused intensified interventions offer the highest returns.**
   Scaling up the **Mandla MEDP plus model,** with surveillance, rapid diagnosis, treatment adherence, and robust managerial oversight in high-burden districts, is the most cost-effective pathway to achieving near elimination by 2030.
   1. India spends only INR 6 per person on malaria, which is far too little to achieve elimination by 2030.
   2. Investing INR 16,414 million/year could cut malaria by 99% and deliver up to 3.18× return.
   3. Malaria elimination is not just a health goal; it is an economic growth and poverty-reduction strategy.
   4. India must shift from donor reliance to secured domestic financing with ring-fenced state and national budgets.
   5. District-focused, Mandla-style intensified interventions are the fastest and most cost-effective route to zero malaria.
